# Supplementary material for: PLCE1 polymorphisms and expression combined with serum AFP level predicts survival of HBV-related hepatocellular carcinoma patients after hepatectomy
Source: PubMed Central journal article supplement (PMC5438724; doi:10.18632/oncotarget.16346), 2017-03-18
Supplement: oncotarget-08-29202-s001.pdf [file oncotarget-08-29202-s001.pdf]

# PLCE1 polymorphisms and expression combined with serum AFP level predicts survival of HBV-related hepatocellular carcinoma patients after hepatectomy

## SUPPLEMENTARY MATERIALS

### SUPPLEMENTARY FIGURES

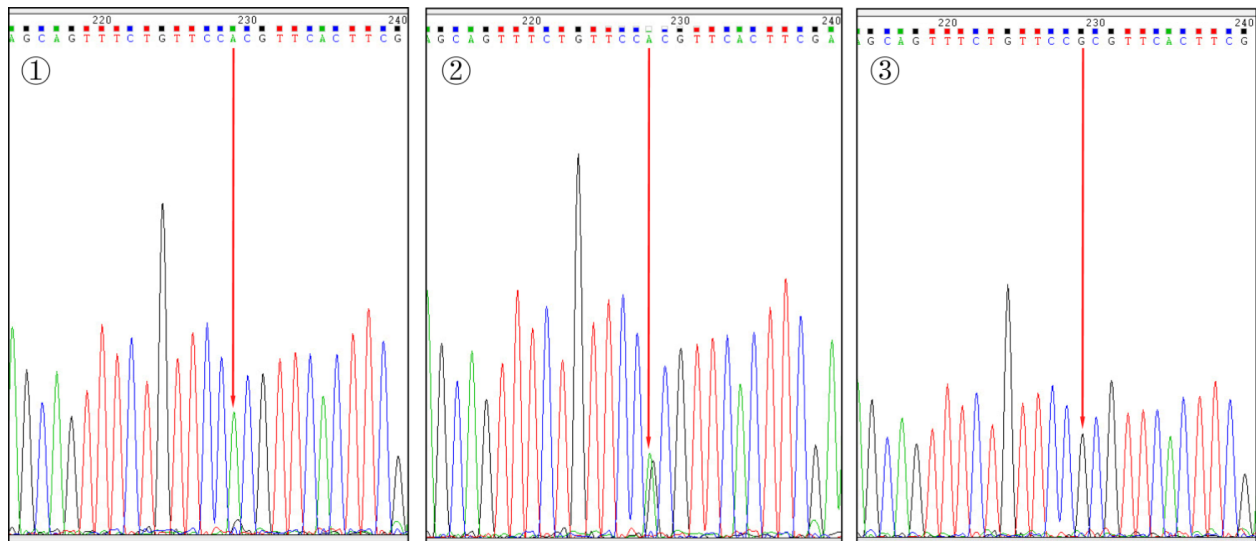

**Supplementary Figure 1: Sequencing map for genotypes of PLCE1 rs2274223 polymorphism.** The arrows in ①–③ show AA, AG, and GG genotypes, respectively

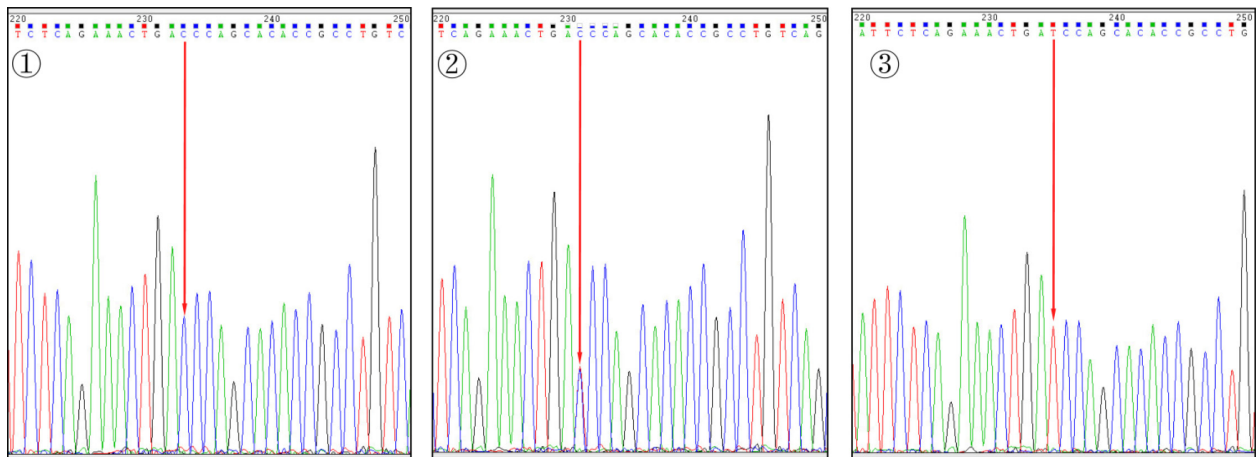

**Supplementary Figure 2: Sequencing map for genotypes of PLCE1 rs376524 polymorphism.** The arrows in ①–③ show CC, CT, and TT genotypes, respectively.
